# Supplementary material for: Prevalence of Cyclomodulin-Positive E. coli and Klebsiella spp. Strains in Mexican Patients with Colon Diseases and Antimicrobial Resistance
Source: MDPI journal article supplement (doi:10.3390/pathogens11010014), 2021-12-23
Supplement: s1 [file s1]

**Supplementary Table S1. Primers used in this study**

| Bacteria                     | Primer      | Sequence (5'-3')           | Size | Reference |
|------------------------------|-------------|----------------------------|------|-----------|
| <i>E. coli</i>               | 16S F       | GTTAATACCTTTGCTCATTGA      | 340  | [45]      |
|                              | 16S R       | ACCAGGGTATCTAATCCTGTT      |      |           |
|                              | ChuA-F      | GACGAACCAACGGTCAGGAT       | 279  |           |
|                              | ChuA-R      | TGCCGCCAGTACCAAAGACA       |      |           |
|                              | YjaA-F      | TGAAGTGTGAGGAGACGCTG       | 211  | [46]      |
|                              | YjaA-R      | ATGGAGAATGCGTTCCTCAAC      |      |           |
|                              | TspE4C2.1-F | GAGTAATGTCGGGGCATTCA       | 152  |           |
|                              | TspE4C2.1-R | CGCGCCAACAAAGTATTACG       |      |           |
|                              | clbB-F      | GCGCATCCTCAAGAGTAAATA      | 280  | [25]      |
|                              | clbB-R      | GCGCTCTATGCTCATCAACC       |      |           |
|                              | CNF-1s      | GGGGGAAGTACAGAAGAATTA      | 1112 | [27]      |
|                              | CNF-1as     | TTGCCGTCCACTCTCACCAGT      |      |           |
|                              | CDT-s1      | GAAAGTAAATGGAATATAAATGTCCG | 555  | [47]      |
|                              | CDT-IIIasa  | TTTGTGTGCGGTGCAGCAGGGAAAA  |      |           |
|                              | cif-int-s   | AACAGATGGCAACAGACTGG       | 383  | [13]      |
|                              | cif-int-as  | AGTCAATGCTTTATGCGTCAT      |      |           |
| <i>E. coli</i> -EPEC         | eae-F       | TCAATGCAGTTCCGTTATCAGTT    | 482  |           |
|                              | eae-R       | GTA AAGTCCGTTACCCCAACCTG   |      |           |
|                              | bfp-F       | GGA AGTCAAATTCATGGGGGTAT   | 300  | [48]      |
|                              | bfp-R       | GGAATCAGACGCAGACTGGTAGT    |      |           |
| <i>E. coli</i> -DAEC         | daaE -F     | GAACGT TGGTTAATGTGGGGTAA   | 542  | [48]      |
|                              | daaE -R     | TATTCACCGGTCGGTTATCAGT     |      |           |
| <i>Klebsiella</i>            | 16S F       | ACTCCTACGGGAGGCAGCAGT      | 383  |           |
|                              | 16S R       | TATTACCGCGGCTGCTGGC        |      |           |
|                              | clbB-F      | GCGCATCCTCAAGAGTAAATA      | 280  | [49]      |
|                              | clbB-R      | GCGCTCTATGCTCATCAACC       |      |           |
| <i>Enterococcus faecalis</i> | 16S F       | CCCTTATTGTTAGTTGCCATCATT   | 144  | [50]      |
|                              | 16S R       | ACTCGTTGTA CT TCCCATTGT    |      |           |

## References

45. Malinen, E.; Kassinen, A.; Rinttilä, T.; Palva, A. Comparison of real-time PCR with SYBR Green I or 5'-nuclease assays and dot-blot hybridization with rDNA-targeted oligonucleotide probes in quantification of selected faecal bacteria. *Microbiology (Reading)* **2003**, *149*, 269–277, doi:10.1099/mic.0.25975-0.
46. Clermont, O.; Bonacorsi, S.; Bingen, E. Rapid and simple determination of the *Escherichia coli* phylogenetic group. *Appl Environ Microbiol* **2000**, *66*, 4555–4558, doi:10.1128/aem.66.10.4555-4558.2000.
47. Toth, I.; Nougayrede, J.P.; Dobrindt, U.; Ledger, T.N.; Boury, M.; Morabito, S.; Fujiwara, T.; Sugai, M.; Hacker, J.; Oswald, E. Cytolethal distending toxin type I and type IV genes are framed with lambdoid prophage genes in extraintestinal pathogenic *Escherichia coli*. *Infect Immun* **2009**, *77*, 492–500, doi:10.1128/IAI.00962-08.
48. Vidal, M.; Kruger, E.; Duran, C.; Lagos, R.; Levine, M.; Prado, V.; Toro, C.; Vidal, R. Single multiplex PCR assay to identify simultaneously the six categories of diarrheagenic *Escherichia coli* associated with enteric infections. *J Clin Microbiol* **2005**, *43*, 5362–5365, doi:10.1128/JCM.43.10.5362-5365.2005.
49. Brisse, S.; Verhoef, J. Phylogenetic diversity of *Klebsiella pneumoniae* and *Klebsiella oxytoca* clinical isolates revealed by randomly amplified polymorphic DNA, *gyrA* and *parC* genes sequencing and automated ribotyping. *Int J Syst Evol Microbiol* **2001**, *51*, 915–924, doi:10.1099/00207713-51-3-915.
50. Rinttilä, T.; Kassinen, A.; Malinen, E.; Krogus, L.; Palva, A. Development of an extensive set of 16S rDNA-targeted primers for quantification of pathogenic and indigenous bacteria in faecal samples by real-time PCR. *J Appl Microbiol* **2004**, *97*, 1166–1177, doi:10.1111/j.1365-2672.2004.02409.x.
